# Supplementary material for: Fragilities Caused by Dosage Imbalance in Regulation of the Budding Yeast Cell Cycle
Source: PLoS Genet. 2010 Apr 22;6(4):e1000919. doi: 10.1371/journal.pgen.1000919 (PMC2858678; doi:10.1371/journal.pgen.1000919)
Supplement: Table S2 — Parameter set (2/3) for simulating the “stabilization model”. (0.02 MB XLS) [file pgen.1000919.s010.xls]

## Sheet: parameter_values
0.054	0.4	1	6	0	0	0	0	0	0	0	0	0	0	0	0	0
0	0.15	0.12	0	0	0	0	0	0	0	0	0	0	0	0	0	0
0.38	0.6	8	0.01	0.01	2	10	2	0	0	0	0	0	0	0	0	0
0.001	0.04	0.003	0.4	0.15	0	0	0	0	0	0	0	0	0	0	0	0
1	0.15	0.1	0.1	0	0	0	0	0	0	0	0	0	0	0	0	0
0.0008	0.005	0.01	0.16	0	0	0	0	0	0	0	0	0	0	0	0	0
0.012	0.12	0.01	1	0.05	0.03	0.06	0.1	0.45	0.3	50	0.05	50	0.06	1	4	0
0.024	0.12	0.004	0.01	1	0.05	0.03	0.06	0.1	0.55	0.3	15	0.5	0.01	0.01	1	4
0.005	0.08	0.08	2	0.05	0	0	0	0	0	0	0	0	0	0	0	0
0.1	0.15	0.1	0.1	0	0	0	0	0	0	0	0	0	0	0	0	0
0.006	0.6	0.3	0.05	0.2	0.01	8	0	0	0	0	0	0	0	0	0	0
0.01	0.01	0.01	0.8	0.03	0.03	0.001	0.08	0.4	0.25	8	1.2	0	0	0	0	0
0.2	0.1	0	0	0	0	0	0	0	0	0	0	0	0	0	0	0
0.084	0.03	0	0	0	0	0	0	0	0	0	0	0	0	0	0	0
200	1	1	20	0	0	0	0	0	0	0	0	0	0	0	0	0
0.05	3	0.01	0.6	0	0	0	0	0	0	0	0	0	0	0	0	0
0.07	6	0	0.01	0.2	0.04	0.04	2	1	0	0	0	0	0	0	0	0
50	0.5	1	0	0	0	0	0	0	0	0	0	0	0	0	0	0
0.1	0.17	2	0.15	0	0	0	0	0	0	0	0	0	0	0	0	0
2	0.06	0.9	0.45	0	0	0	0	0	0	0	0	0	0	0	0	0
0.2	0.06	0.25	0.05	1	0	0	0	0	0	0	0	0	0	0	0	0
0.1	0.06	0.14	0	0	0	0	0	0	0	0	0	0	0	0	0	0
0.1	1	0.2	1	0	0	0	0	0	0	0	0	0	0	0	0	0
1	0.1	0.1	0	0	0	0	0	0	0	0	0	0	0	0	0	0
1	0.002	1	0.001	0.5	0	0	0	0	0	0	0	0	0	0	0	0
0.3	90	1	0.2	0	0	0	0	0	0	0	0	0	0	0	0	0
1	1	1	0	0	0	0	0	0	0	0	0	0	0	0	0	0
